# Supplementary material for: Production of 14α-Hydroxy Progesterone Using a Steroidal Hydroxylase from Cochliobolus lunatus Expressed in Escherichia coli
Source: MDPI journal article supplement (doi:10.3390/catal14040247), 2024-04-08
Supplement: s1 [file s1]

# *Catalysts*

Supporting Information

**Production of 14 $\alpha$ -hydroxyprogesterone using a  
steroidal hydroxylase from *Cochliobolus lunatus*  
expressed in *Escherichia coli***

## Supporting Information

Text: NMR data of 11 $\beta$ -OH PROG and 14 $\alpha$ -OH PROG.

Table S1: List of primers using in this article.

Figure S1: ProSA Z-Score result of the  $\Delta P$ -450<sub>lun</sub> model.

Figure S2: Ramachandran Plot of the structure of  $\Delta P$ -450<sub>lun</sub>.

Figure S3: <sup>1</sup>H-NMR spectrum of isolated 11 $\beta$ -OH PROG (600 MHz, CDCl<sub>3</sub>).

Figure S4: <sup>13</sup>C-NMR spectrum of isolated 11 $\beta$ -OH PROG (600 MHz, CDCl<sub>3</sub>).

Figure S5: <sup>1</sup>H-NMR spectrum of isolated 14 $\alpha$ -OH PROG (600 MHz, CDCl<sub>3</sub>).

Figure S6: <sup>13</sup>C-NMR spectrum of isolated 14 $\alpha$ -OH PROG (600 MHz, CDCl<sub>3</sub>).

Figure S7: Binding pocket properties of  $\Delta P$ -450<sub>lun</sub> and  $\Delta P$ -450<sub>lun</sub>-F297W.

Text: NMR data of 11 $\beta$ -OH PROG and 14 $\alpha$ -OH PROG

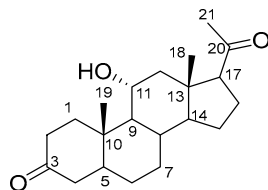

11 $\beta$ -OH-Prog,  $^1\text{H}$  NMR (600 M,  $\text{CDCl}_3$ ,  $\delta$  ppm): 0.91 (3H, s, H-18), 1.45 (3H, s, H-19), 2.13 (3H, s, H-21), 4.41 (1H, dd,  $J = 3.2$  Hz, 6.3 Hz; H-11 $\alpha$ ), 5.68 (1H, s, H-4);  $^{13}\text{C}$  NMR (150 M,  $\text{CDCl}_3$ ,  $\delta$  ppm): 209.0 (C-20), 199.4 (C-3), 171.9 (C-5), 122.4 (C-4), 68.2 (C-11), 63.8 (C-17), 57.5 (C-14), 56.4 (C-9), 48.3 (C-12), 42.9 (C-13), 39.2 (C-10), 35.0 (C-1), 33.8 (C-2), 32.6 (C-6), 32.0 (C-7), 31.3 (C-8), 31.2 (C-21), 24.3 (C-15), 22.7 (C-16), 21.0 (C-19), 15.9 (C-18).

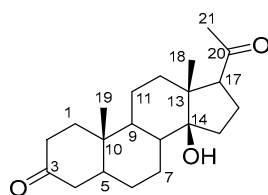

14 $\alpha$ -OH-Prog,  $^1\text{H}$  NMR (600 M,  $\text{CDCl}_3$ ,  $\delta$  ppm): 0.79 (3H, s, H-18), 1.20 (3H, s, H-19), 2.13 (3H, s, H-21), 3.23 (1H, t,  $J = 8.8$  Hz; H-17 $\alpha$ ), 5.74 (1H, s, H-4);  $^{13}\text{C}$  NMR (150 M,  $\text{CDCl}_3$ ,  $\delta$  ppm): 210.3 (C-20), 199.5 (C-3), 170.3 (C-5), 124.0 (C-4), 85.2 (C-14), 59.4 (C-17), 47.9 (C-13), 46.3 (C-9), 38.6 (C-10), 38.3 (C-8), 35.8 (C-1), 34.0 (C-2), 33.4 (C-12), 32.6 (C-6), 31.5 (C-21), 30.9 (C-15), 27.1 (C-7), 21.4 (C-11), 20.1 (C-16), 17.2 (C-18), 17.2 (C-19).

Table S1: List of primers using in this article

| Primer                          | Sequence (5' - 3')                                                    |
|---------------------------------|-----------------------------------------------------------------------|
| CPR <sub>lun</sub> -F           | AAAAAAC <u>CATATG</u> ATGAGTGCCGATCCGTATGG                            |
| CPR <sub>lun</sub> -R           | AAAAAA <u>AAGCTT</u> TAAACTCCAAACGTCTTC                               |
| P-450 <sub>lun</sub> -F         | AAAAAAG <u>CTAGC</u> ATGGATACCCAGACTGTCGAG                            |
| P-450 <sub>lun</sub> -R         | AAAAAA <u>CTTAAG</u> TAACTCCAAACGTCTTCCTG                             |
| CPR <sub>lunΔ31</sub> -F        | AAAAAA <u>CATATG</u> AGTGCCGATCCGTATG                                 |
| CPR <sub>lunΔ31</sub> -R        | AAAAAA <u>AAGCTT</u> TAAACTCCAAACGTCTTC                               |
| P-450 <sub>lunΔ29</sub> -F      | AAAAAAG <u>CTAGC</u> ATGCCCAAACACTACAACCAATG                          |
| P-450 <sub>lunΔ29</sub> -R      | AAAAAA <u>CTTAAG</u> TAACTCCAAACGTCTTCCTG                             |
| P-450 <sub>lun</sub> _D2A-F     | AAAAAAG <u>CTAGC</u> ATGGCGACCCAGACTGTCGAG                            |
| P-450 <sub>lun</sub> _D2A-R     | AAAAAA <u>CTTAAG</u> TAACTCCAAACGTCTTCCTG                             |
| P-450 <sub>lun</sub> _AKKTS-F   | AAAAAAG <u>CTAGC</u> ATGGCGAAGAAGACCAGCCCCAAACTACAAC<br>CAATG         |
| P-450 <sub>lun</sub> _AKKTS-R   | AAAAAA <u>CTTAAG</u> TAACTCCAAACGTCTTCCTG                             |
| P-450 <sub>lun</sub> _ALLAVFL-F | AAAAAAG <u>CTAGC</u> ATGGCGCTGCTGCTGGCGGTTTTTCTGCCCAA<br>CTACAACCAATG |
| P-450 <sub>lun</sub> _ALLAVFL-R | AAAAAA <u>CTTAAG</u> TAACTCCAAACGTCTTCCTG                             |
| P108A-F                         | AGTTTTGCGGAGGCTCTTACCGAGGAC                                           |
| P108A-R                         | AGAGCCTCCGCAAAACTGAGAACATCG                                           |
| E109A-F                         | AGTTTCCAGCGGCTCTTACCGAGGAC                                            |
| E109A-R                         | AGAGCCGCTGGAAAACACTGAGAACATCG                                         |
| L122A-F                         | TACACACATGCGTCGATTGAAAACCCAC                                          |
| L122A-R                         | AATCGACGCATGTGTGATTGATTCCAAG                                          |
| S294A-F                         | CCAGCTTGCGCTGATCTTCGCCGC                                              |
| S294A-R                         | GAAGATCAGCGCAAGCTGGGTTTTGGCG                                          |
| F297A-F                         | TCTGATCGCGGCCGCCATTACACG                                              |
| F297A-R                         | GCGGCCGCGATCAGAGAAAGCTG                                               |
| T364A-F                         | CGGACCTGCGATGACATCCTTTACC                                             |
| T364A-R                         | ATGTCATCGCAGGTCCGGTGAATCGC                                            |
| S367A-F                         | ATGACAGCGTTTACCCGCCGTGCCCGTAAAG                                       |
| S367A-R                         | GGCGGGTAAACGCTGTCATGGTAGGTC                                           |
| S368A-F                         | ATGACATCCGCGACCCGCCGTGCCCGTAAAG                                       |
| S368A-R                         | GGCGGGTCCGCGATGTCATGGTAGGTC                                           |
| E109NNK-F                       | AGTTTTCCANNK <b>KG</b> CTCTTACCGAGGAC                                 |
| E109NNK-R                       | AGAGCMNNGGAAAACACTGAGAACATCG                                          |
| F297NNK-F                       | TCTGATC <b>NNK</b> GCCGCCATTACACG                                     |
| F297NNK-R                       | GCGGCMNNGATCAGAGAAAGCTG                                               |
| F297W-F                         | TCTGATCTGGGCCGCCATTACACG                                              |
| F297W-R                         | GCGGCCAGATCAGAGAAAGCTG                                                |

Underline: restriction endonuclease cleavage site; Bold: mutant site.

### Overall model quality

Z-Score: **-8.25**

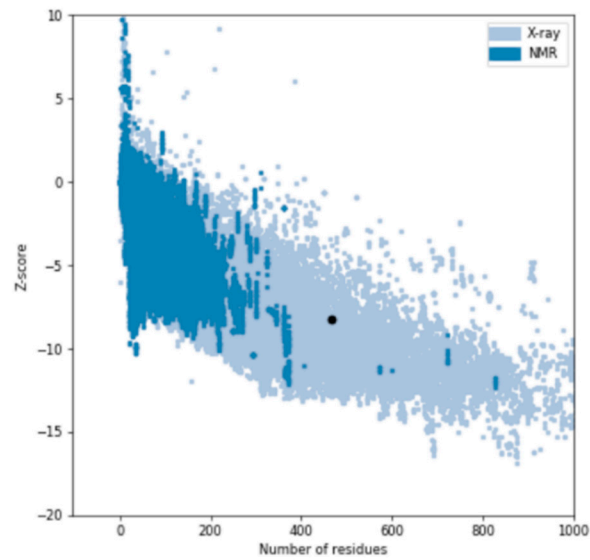

Figure S1: ProSA Z-Score result of the  $\Delta P$ -450<sub>lun</sub> model.

PROCHECK

### Ramachandran Plot

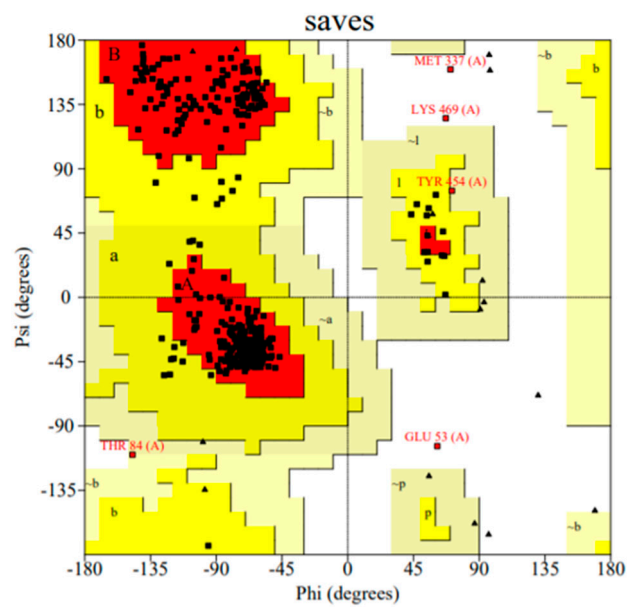

Plot statistics

|                                                      |     |        |
|------------------------------------------------------|-----|--------|
| Residues in most favoured regions [A,B,L]            | 376 | 91.0%  |
| Residues in additional allowed regions [a,b,l,p]     | 32  | 7.7%   |
| Residues in generously allowed regions [-a,-b,-l,-p] | 2   | 0.5%   |
| Residues in disallowed regions                       | 3   | 0.7%   |
| Number of non-glycine and non-proline residues       | 413 | 100.0% |
| Number of end-residues (excl. Gly and Pro)           | 2   |        |
| Number of glycine residues (shown as triangles)      | 20  |        |
| Number of proline residues                           | 31  |        |
| Total number of residues                             | 466 |        |

Figure S2: Ramachandran Plot of the structure of  $\Delta P$ -450<sub>lun</sub>.

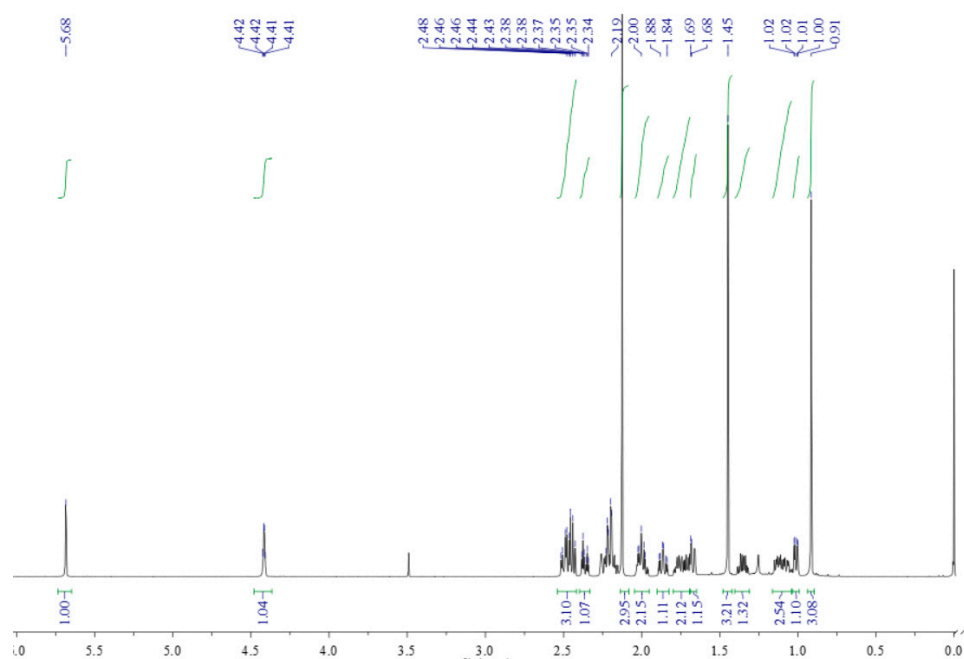

Figure S3: <sup>1</sup>H-NMR spectrum of isolated 11β-OH PROG (600 MHz, CDCl<sub>3</sub>).

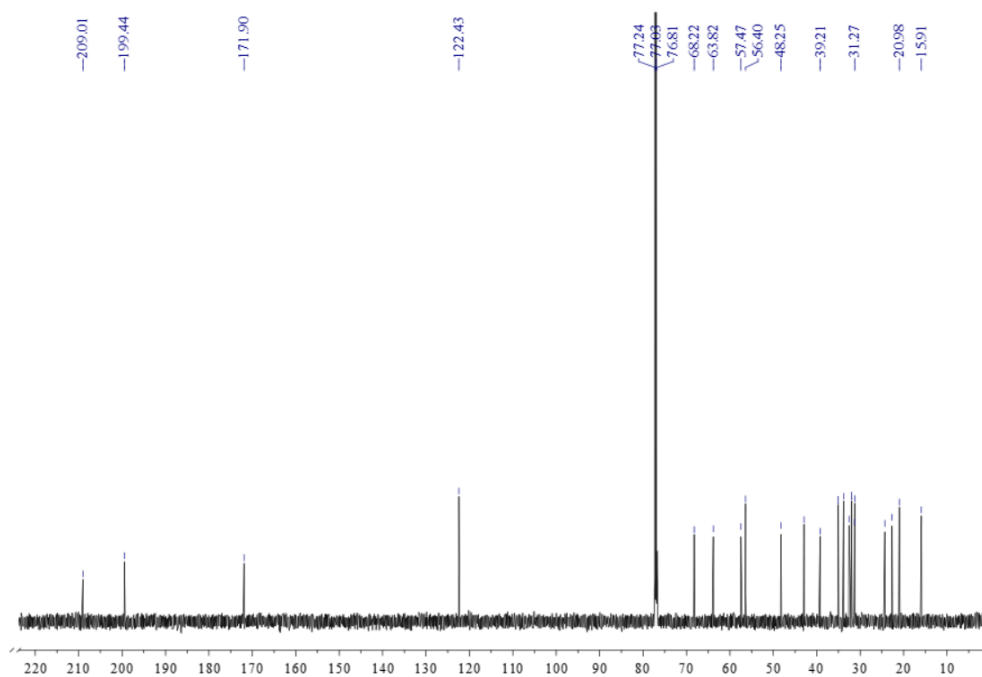

Figure S4: <sup>13</sup>C-NMR spectrum of isolated 11β-OH PROG (600 MHz, CDCl<sub>3</sub>).

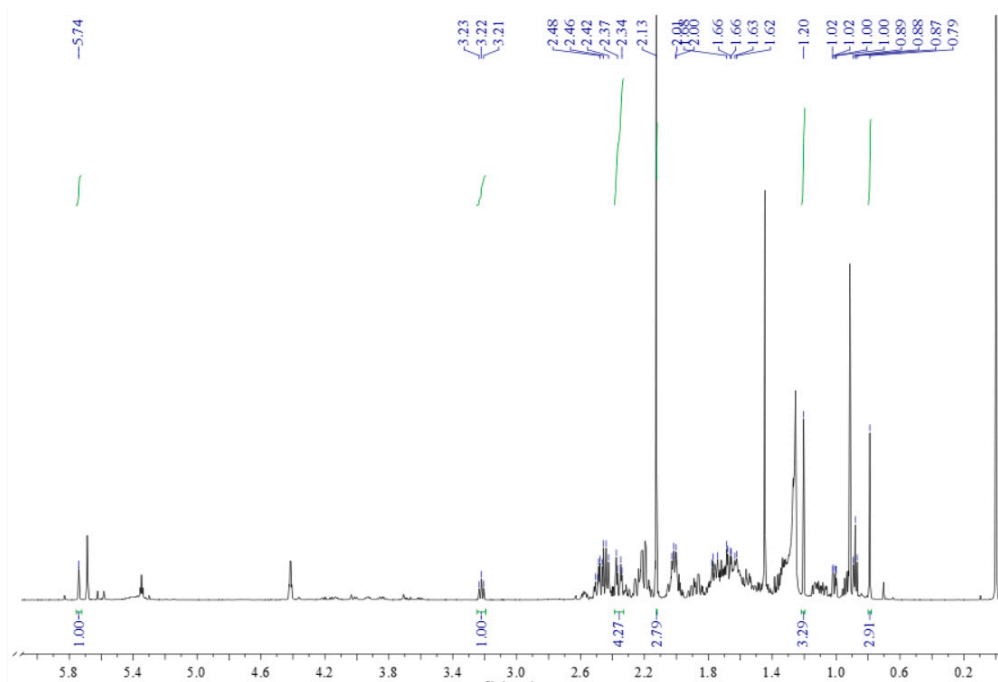

Figure S5: <sup>1</sup>H-NMR spectrum of isolated 14α-OH PROG (600 MHz, CDCl<sub>3</sub>).

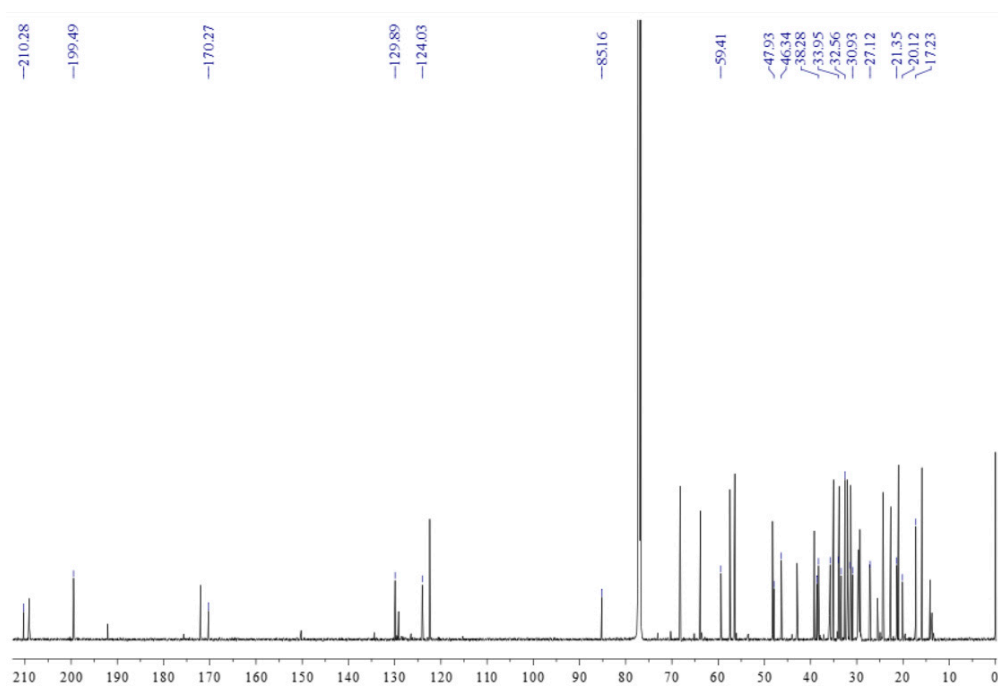

Figure S6: <sup>13</sup>C-NMR spectrum of isolated 14α-OH PROG (600 MHz, CDCl<sub>3</sub>).

**A**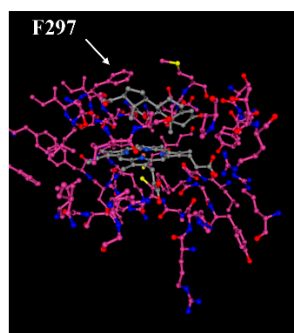

Acceptors: 39  
Depth: 29.88 Å  
Donors: 25  
Hydrophobicity: 0.72  
Metal: 1  
Protein Heavy Atoms: 339  
Surface: 1519.90 Å<sup>2</sup>  
Surface-Volume-Ratio: 1.00  
Volume: 1526.27 Å<sup>3</sup>

**B**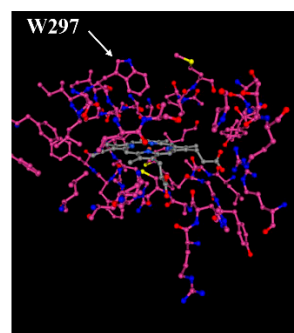

Acceptors: 35  
Depth: 28.15 Å  
Donors: 21  
Hydrophobicity: 0.74  
Metal: 1  
Protein Heavy Atoms: 338  
Surface: 1412.57 Å<sup>2</sup>  
Surface-Volume-Ratio: 1.04  
Volume: 1357.82 Å<sup>3</sup>

Figure S7: Binding pocket properties of  $\Delta P$ -450<sub>lun</sub> (A) and  $\Delta P$ -450<sub>lun</sub>-F297W (B)
